# Supplementary material for: A careful reassessment of anthracycline use in curable breast cancer
Source: PubMed Central journal article supplement (PMC8501074; doi:10.1038/s41523-021-00342-5), 2021-10-08
Supplement: 41523_2021_342_MOESM1_ESM.pdf [file 41523_2021_342_MOESM1_ESM.pdf]

Supplementary Table 1a: Studies showing no benefit of anthracyclines (pre-taxanes)

| Study (Year)                            | Ref | Regimens                                      | N    | Outcomes                                                                                               | P                         | Safety                                                                          |
|-----------------------------------------|-----|-----------------------------------------------|------|--------------------------------------------------------------------------------------------------------|---------------------------|---------------------------------------------------------------------------------|
| NSABP-B12 (1989)<br>Fisher et al        | 23  | PAF-Tam vs<br>PF-Tam                          | 1106 | 5Y DFS: 64% vs 63%<br>5Y OS: 77% vs 78%                                                                | 0.40<br>0.90              | Symptomatic CHF: 0.6% vs 0%<br>Leukemia/MPD: 0.009% vs 0.007%                   |
| NSABP-B15 (1990)<br>Fisher et al        | 24  | AC vs<br>AC-CMF vs<br>CMF                     | 2194 | 3Y DFS: 62% vs 68% vs 63%<br>3Y DDFS: 68% vs 70% vs 68%<br>3Y OS: 83% vs 84% vs 82%                    | 0.50<br>0.50<br>0.80      | Symptomatic CHF: 0.1% vs 0% vs 0%<br>Leukemia/MPD: Not reported                 |
| Moliterni et al (1991)                  | 25  | CMF-A vs<br>CMF                               | 486  | 5Y RFS: 72% vs 74%<br>5Y OS: 86% vs 89%                                                                | 0.73<br>NR                | Symptomatic CHF: 0% vs 0.004%<br>Leukemia/MPD: Not reported due to size         |
| Naples GUN-3 (1995)<br>De Placido et al | 26  | CMF-EV vs<br>CMF                              | 220  | 4Y DFS: 51% vs 46%<br>4Y OS: 77% vs 74%                                                                | 0.66<br>0.58              | Symptomatic CHF: None reported<br>Leukemia/MPD: None reported                   |
| Bang et al (2000)                       | 27  | AC vs<br>CMF                                  | 124  | 5Y DFS: 64% vs 78%<br>5Y OS: 90% vs 86%                                                                | 0.12<br>0.96              | Symptomatic CHF: None reported<br>Leukemia/MPD: None reported                   |
| Mauriac et al (1992)                    | 28  | MyTV-EVM vs<br>CMF                            | 228  | 5Y Total RFS: 80% vs 69%<br>-Local RFS: 97% vs 94%<br>-Distant RFS: 84% vs 83%<br>5Y OS: No difference | 0.05<br>NR<br>NR<br>NR    | Symptomatic CHF: None reported<br>Leukemia/MPD: None reported                   |
| Budd et al (1995)                       | 29  | FAC-M vs<br>CMFVPd                            | 531  | 5Y DFS: 50% vs 55%<br>5Y OS: 61% vs 64%                                                                | NR<br>0.06                | Symptomatic CHF: 0.004% vs 0%<br>Leukemia: 0.007% vs 0%                         |
| Carpenter et al (1994)                  | 30  | CAF vs<br>CMF                                 | 528  | 5Y OS: 74% vs 68%                                                                                      | 0.41                      | Symptomatic CHF: Unknown<br>Leukemia/MPD: Unknown                               |
| Levine et al (1990)                     | 31  | CMFVPd-ATam<br>(12 wks) vs<br>CMFVPd (36 wks) | 437  | 3Y RFS: 55% vs 64%<br>3Y OS: 78% vs 85%                                                                | 0.003<br>0.04             | Symptomatic CHF: None reported<br>Leukemia: 0% vs 0.005%                        |
| Coombes et al (1996)                    | 32  | FEC vs<br>CMF                                 | 759  | 8Y RFS: 65% vs 64%<br>8Y OS: 82% vs 79%                                                                | 0.61<br>0.13              | Symptomatic CHF: 0.003% vs 0%<br>Leukemia: None reported                        |
| TAX 303<br>Piccart et al (2001)         | 33  | EC vs<br>EC (high dose) vs<br>CMF             | 777  | 3Y EFS: 72% vs 80% vs 78%<br>3Y OS: 89% vs 92% vs 91%                                                  | NR*<br>NR*                | Symptomatic CHF: 0.004% vs 0.01% vs 0%<br>Leukemia: 0% vs 0.01% vs 0%           |
| NSABP-B23 (2001)<br>Fisher et al        | 34  | AC+Tam vs<br>CMF+Tam**                        | 2008 | 5Y RFS: 87% vs 87%<br>5Y EFS: 82% vs 83%<br>5Y OS: 90% vs 89%                                          | 0.96<br>0.80<br>0.80      | Symptomatic CHF: None reported<br>Leukemia/MPD: None reported                   |
| INT-0102 (2005)<br>Hutchins et al       | 9   | CAF vs<br>CMF                                 | 2690 | 10Y DFS: 77% vs 75%<br>10Y OS: 85% vs 82%                                                              | 0.13<br>0.03 <sup>†</sup> | Symptomatic CHF: Similar in both arms<br>Leukemia/MPD: Not increased in CAF arm |

Supplementary Table 1b: Studies showing benefit of anthracyclines (pre-taxanes)

| Study (Year)                     | Ref | Regimens     | N    | Outcomes (A v. NA)                                                    | P                                     | Safety (A v. NA)                                                      |
|----------------------------------|-----|--------------|------|-----------------------------------------------------------------------|---------------------------------------|-----------------------------------------------------------------------|
| NSABP-B11 (1989)<br>Fisher et al | 23  | PAF<br>PF    | 707  | 5Y DFS: 51% vs 44%<br>5Y OS: 65% vs 59%                               | 0.007<br>0.08                         | Symptomatic CHF: 0.6% vs 0.3%<br>Leukemia/MPD: 0% vs 0.003%           |
| Misset et al (1996)              | 37  | AVCF<br>CMF  | 249  | 16Y DFS <sup>‡</sup> : 53% vs 36%<br>16Y OS <sup>‡</sup> : 56% vs 41% | 0.006<br>0.01                         | Symptomatic CHF: Similar in both arms<br>Leukemia/MDS: 0% vs 0%       |
| Ejlertsen et al (2007)           | 38  | CEF<br>CMF   | 1224 | 10Y DFS: 55% vs 50%<br>10Y OS: 62% vs 55%                             | 0.04<br><0.01                         | Symptomatic CHF: Not increased in CEF<br>Leukemia/MPD: 0.003 vs 0.003 |
| Poole et al (2006)               | 39  | E-CMF<br>CMF | 2401 | 5Y RFS: 76% vs 69%<br>5Y OS: 82% vs 75%                               | <0.001<br><0.001                      | Symptomatic CHF: None reported<br>Leukemia/MPD: 0.0008% vs 0%         |
| Levine et al (1998)              | 35  | CEF<br>CMF   | 710  | 10Y RFS: 52% vs 45%<br>10Y OS: 62% vs 58%                             | 0.007<br>0.085                        | Symptomatic CHF: 1.1% vs 0.3%<br>Leukemia/MPD: 0.014% vs 0.003%       |
| Martin et al (2003)              | 40  | FAC<br>CMF   | 985  | 5Y DFS: 58% vs 50%<br>5Y OS: 75% vs 69%                               | 0.056 <sup>f</sup><br>NS <sup>f</sup> | Cardiotoxicity: 2.1% vs 0.2%<br>Leukemia/MPD: None reported           |
| De Placido et al (2005)          | 36  | A-CMF<br>CMF | 466  | 5Y DFS: 65% vs 54%<br>5Y OS: 83% vs 79%                               | 0.044<br>0.26                         | Symptomatic CHF: None reported<br>Leukemia/MPD: None reported         |

Abbreviations:

P (melphalan), A (doxorubicin), F (fluorouracil), Tam (tamoxifen), C (cyclophosphamide), M (methotrexate), E (epirubicin), V (vincristine), My (mitomycin C), T (thiotepa), Pd (prednisone)

\* - No difference in EFS or OS between CMF and EC (high dose) groups, but overall p value not reported for all three groups

\*\* - study also looked at addition of tamoxifen vs placebo to each group, which did not impact any survival outcomes. Overall p values for all 4 groups are shown, but, for simplicity, survival percentages reported here represent tamoxifen including arms only.

† - slight benefit shown in OS in CAF group based on one-sided p value, but because of greater overall toxicity authors could not conclude CAF to be superior to CMF

‡ - median follow up 16 years (range 13-17 years)

f – significant effect seen in prospectively formed node negative population, with (respectively for FAC vs CMF) 5Y DFS 75% vs 67%, P = 0.041; 5Y OS percentage not reported, but difference was significant (P = 0.034).
